# Supplementary material for: Developmental Stage-Specific Regulation of the Circadian Clock by Temperature in Zebrafish
Source: Hindawi journal article supplement (doi:10.1155/2014/930308), 2014-01-01

## A pBPer1b-luc-I-SceI

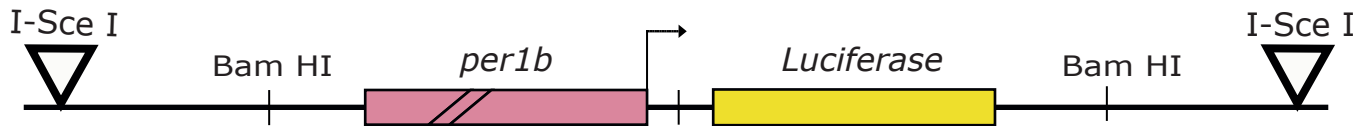

## B pBluescript SK- CMV-I-Sce I meganuclease enzyme

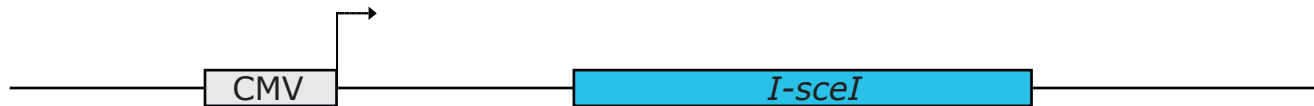

Supplement: f1 [file 930308.f1.pdf]
